# Supplementary material
Source: PubMed Central journal article supplement (PMC7472837)
Supplement: NIHMS1599423-supplement-Updated_Supplementary_Material.pdf [file NIHMS1599423-supplement-Updated_Supplementary_Material.pdf]

**Supplemental Information**

**Homogeneous Oligomers of Pro-apoptotic  
BAX Reveal Structural Determinants  
of Mitochondrial Membrane Permeabilization**

**Zachary J. Hauseman, Edward P. Harvey, Catherine E. Newman, Thomas E. Wales, Joel C. Bucci, Julian Mintseris, Devin K. Schweppe, Liron David, Lixin Fan, Daniel T. Cohen, Henry D. Herce, Rida Mourtada, Yael Ben-Nun, Noah B. Bloch, Scott B. Hansen, Hao Wu, Steven P. Gygi, John R. Engen, and Loren D. Walensky**

A

| Detergent                                                           | Molecular Weight (g/mol) | Critical Micelle Concentration (mM) |
|---------------------------------------------------------------------|--------------------------|-------------------------------------|
| n-Dodecylphosphocholine (Fos-12)                                    | 351.5                    | 1.5                                 |
| n-Decyl- $\beta$ -D-maltoside (DM)                                  | 482.6                    | 1.8                                 |
| n-Dodecyl- $\beta$ -D-maltoside (DDM)                               | 510.6                    | 0.17                                |
| n,n-dimethyl-n-dodecylamine-n-oxide (LDAO)                          | 229.4                    | 1                                   |
| 3-((3-cholamidopropyl) dimethyl ammonio)-1-propanesulfonate (CHAPS) | 614.9                    | 8                                   |

B

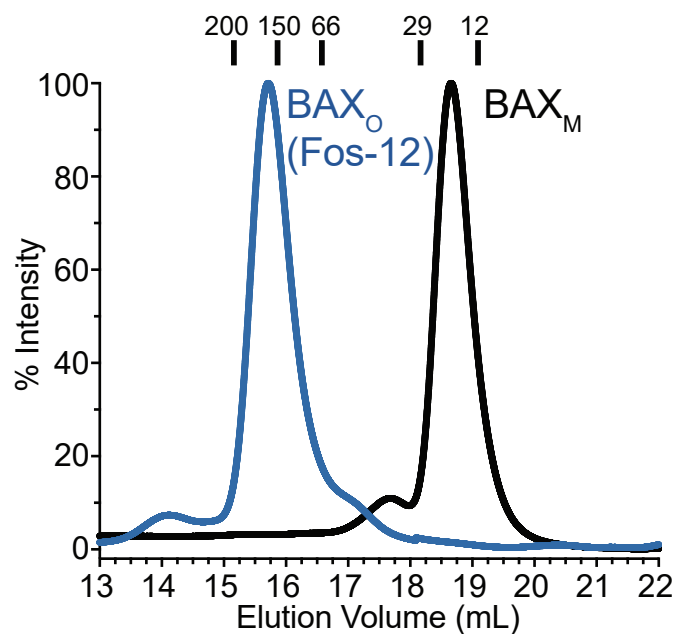

C

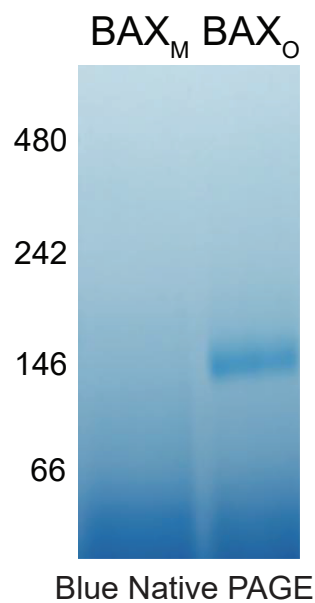

D

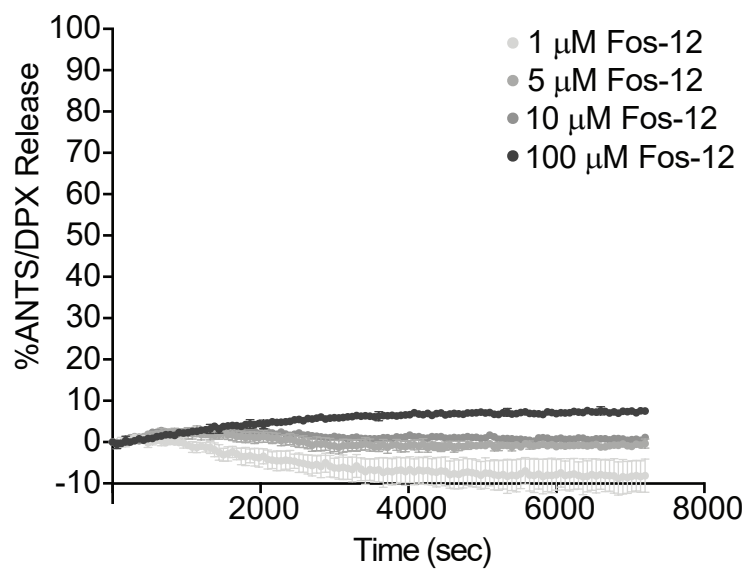

Figure S1

**Figure S1, Related to Figure 1. Production of BAX<sub>o</sub> at submicellar concentrations of Fos-12 and stability of the generated species in the absence of detergent.**

(A) Characteristics of detergents screened for induction of BAX oligomerization.

(B) SEC analysis of BAX<sub>M</sub> and BAX<sub>o</sub> generated by treatment of BAX<sub>M</sub> with submicellar concentration of Fos-12 (1 mM).

(C) Blue native PAGE analysis of BAX<sub>M</sub> and Fos-12 induced BAX<sub>o</sub> isolated in the absence of detergent, demonstrating the stability of the oligomeric band migrating at ~146 kDa.

(D) Treatment of liposomes with the indicated doses of Fos-12. Error bars are mean  $\pm$  SEM for liposomal release experiments performed in technical triplicate, with data representative of two independent experiments.

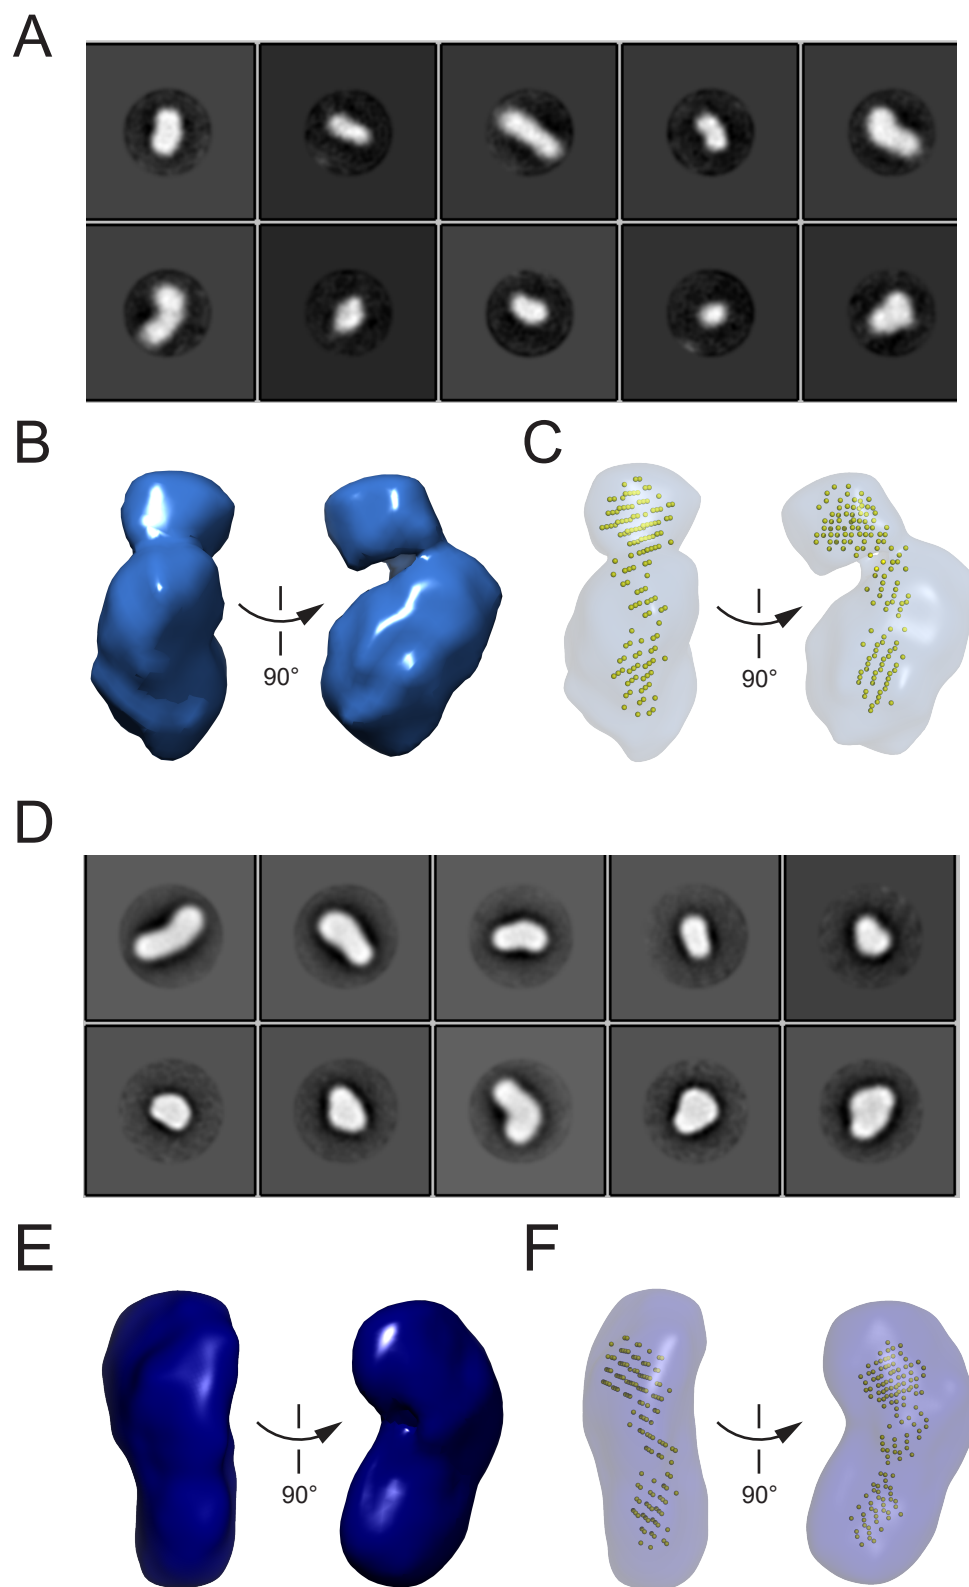

Figure S2

**Figure S2, Related to Figure 1. Negative stain EM reveals the curvilinear structure of BAX<sub>o</sub>.**

(A-C) Two-dimensional classification of negative stain EM of Fos-12-induced BAX<sub>o</sub> (A) and the derived three-dimensional reconstruction (B) match the curvilinear envelope derived from SAXS analysis (C).

(D-F) Two-dimensional classification (D) and three-dimensional reconstruction of BAX<sub>o</sub> (E) generated by an alternative method, namely BIM SAHB<sub>A2</sub>-triggered BAX<sub>M</sub> in the presence of liposomes followed by BAX<sub>o</sub> extraction, likewise yielded a curvilinear macromolecular structure, mirroring the size and shape of the species observed by SAXS (F) and EM analyses of Fos-12-induced BAX<sub>o</sub> (A-C).

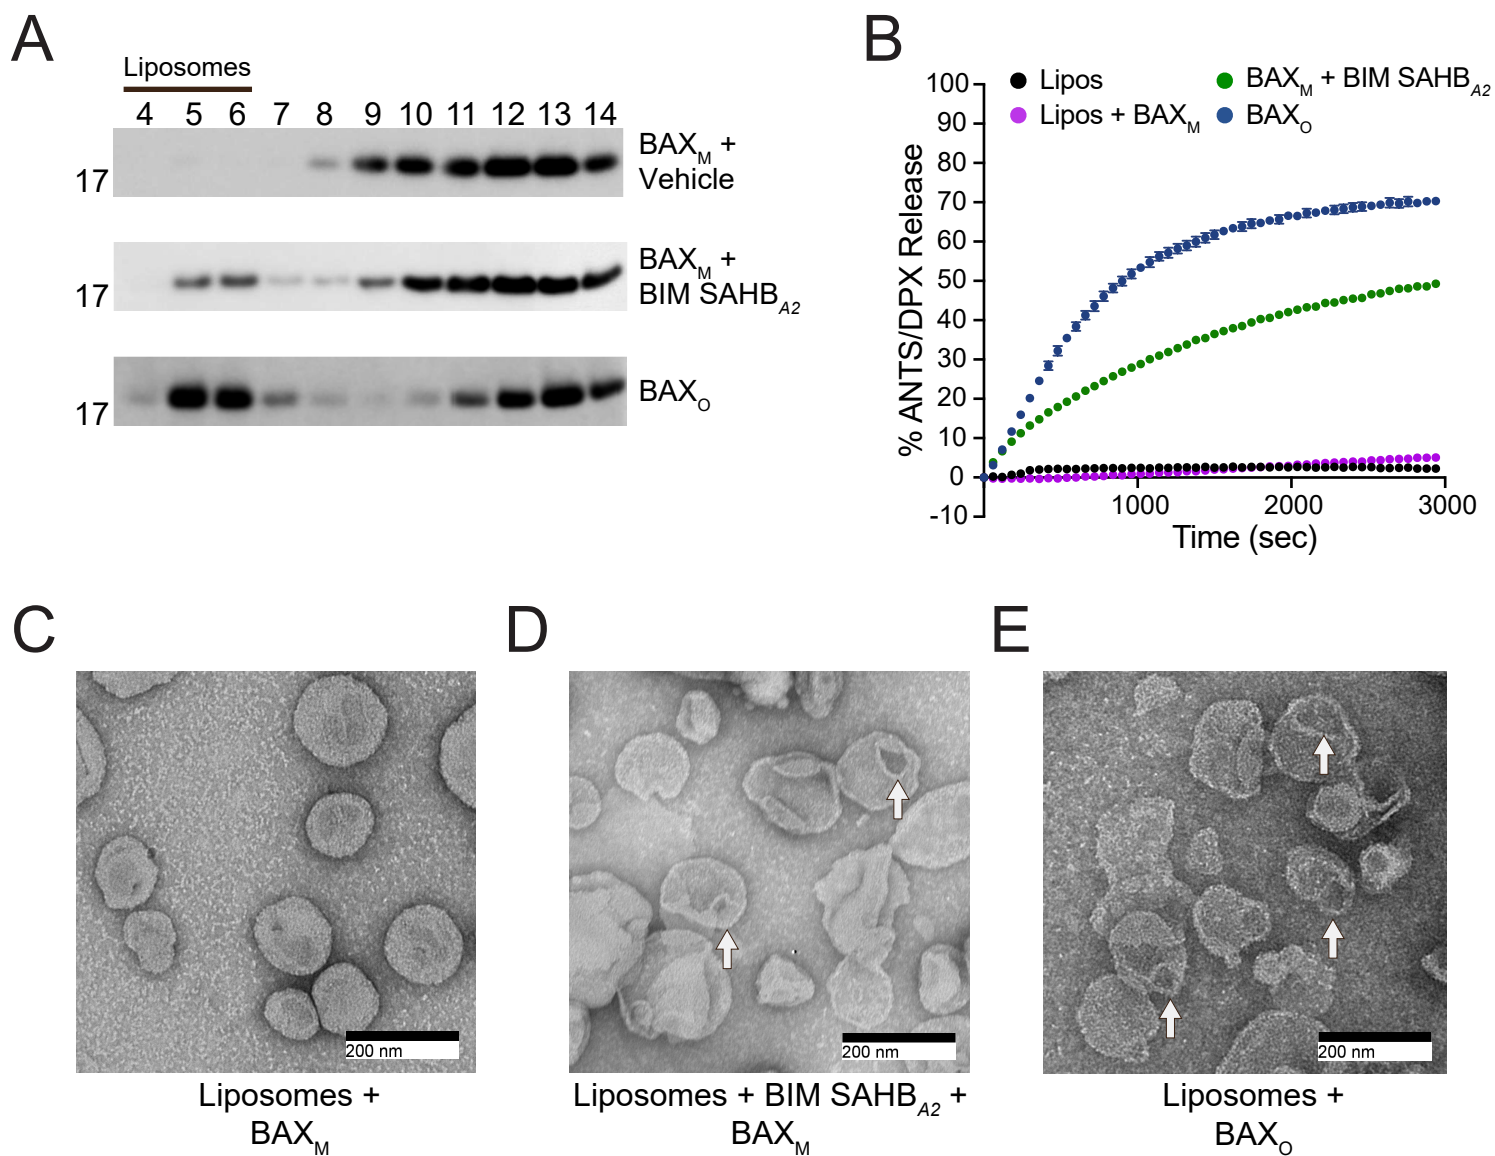

Figure S3

**Figure S3, Related to Figure 2. Comparative membrane translocation, liposomal release, and morphology of BAX<sub>M</sub>, BIM SAHB<sub>A2</sub>-triggered BAX<sub>M</sub>, and BAX<sub>O</sub> treated liposomes.**

(A) Both BAX<sub>O</sub> and BIM SAHB<sub>A2</sub>-triggered BAX<sub>M</sub> translocate to liposomes, whereas the totality of vehicle-treated BAX<sub>M</sub> remains in the soluble fraction, as monitored by liposomal translocation assay and BAX western analysis. Liposomal fractions (4-6) are marked with an overlying black bar, with supernatant fractions to the right (7-14). The data shown are representative of two independent biological replicates. BAX<sub>M</sub>, 500 nM; BAX<sub>O</sub>, 500 nM; BIM SAHB<sub>A2</sub>, 500 nM.

(B) BAX<sub>O</sub> and BIM SAHB<sub>A2</sub>-triggered BAX<sub>M</sub> induce liposomal poration, as assessed by liposomal release assay. Error bars are mean  $\pm$  SEM for liposomal release experiments performed in technical triplicate, with data representative of two independent experiments. BAX<sub>M</sub>, 500 nM; BAX<sub>O</sub>, 500 nM; BIM SAHB<sub>A2</sub>, 500 nM.

(C-E) Negative stain electron micrographs of liposomes incubated with BAX<sub>M</sub> (C), BIM SAHB<sub>A2</sub>-triggered BAX<sub>M</sub> (D), or BAX<sub>O</sub> (E), highlighting the similar morphology of membrane disruption induced by BH3-triggered BAX<sub>M</sub> and BAX<sub>O</sub> in the liposomal membranes.

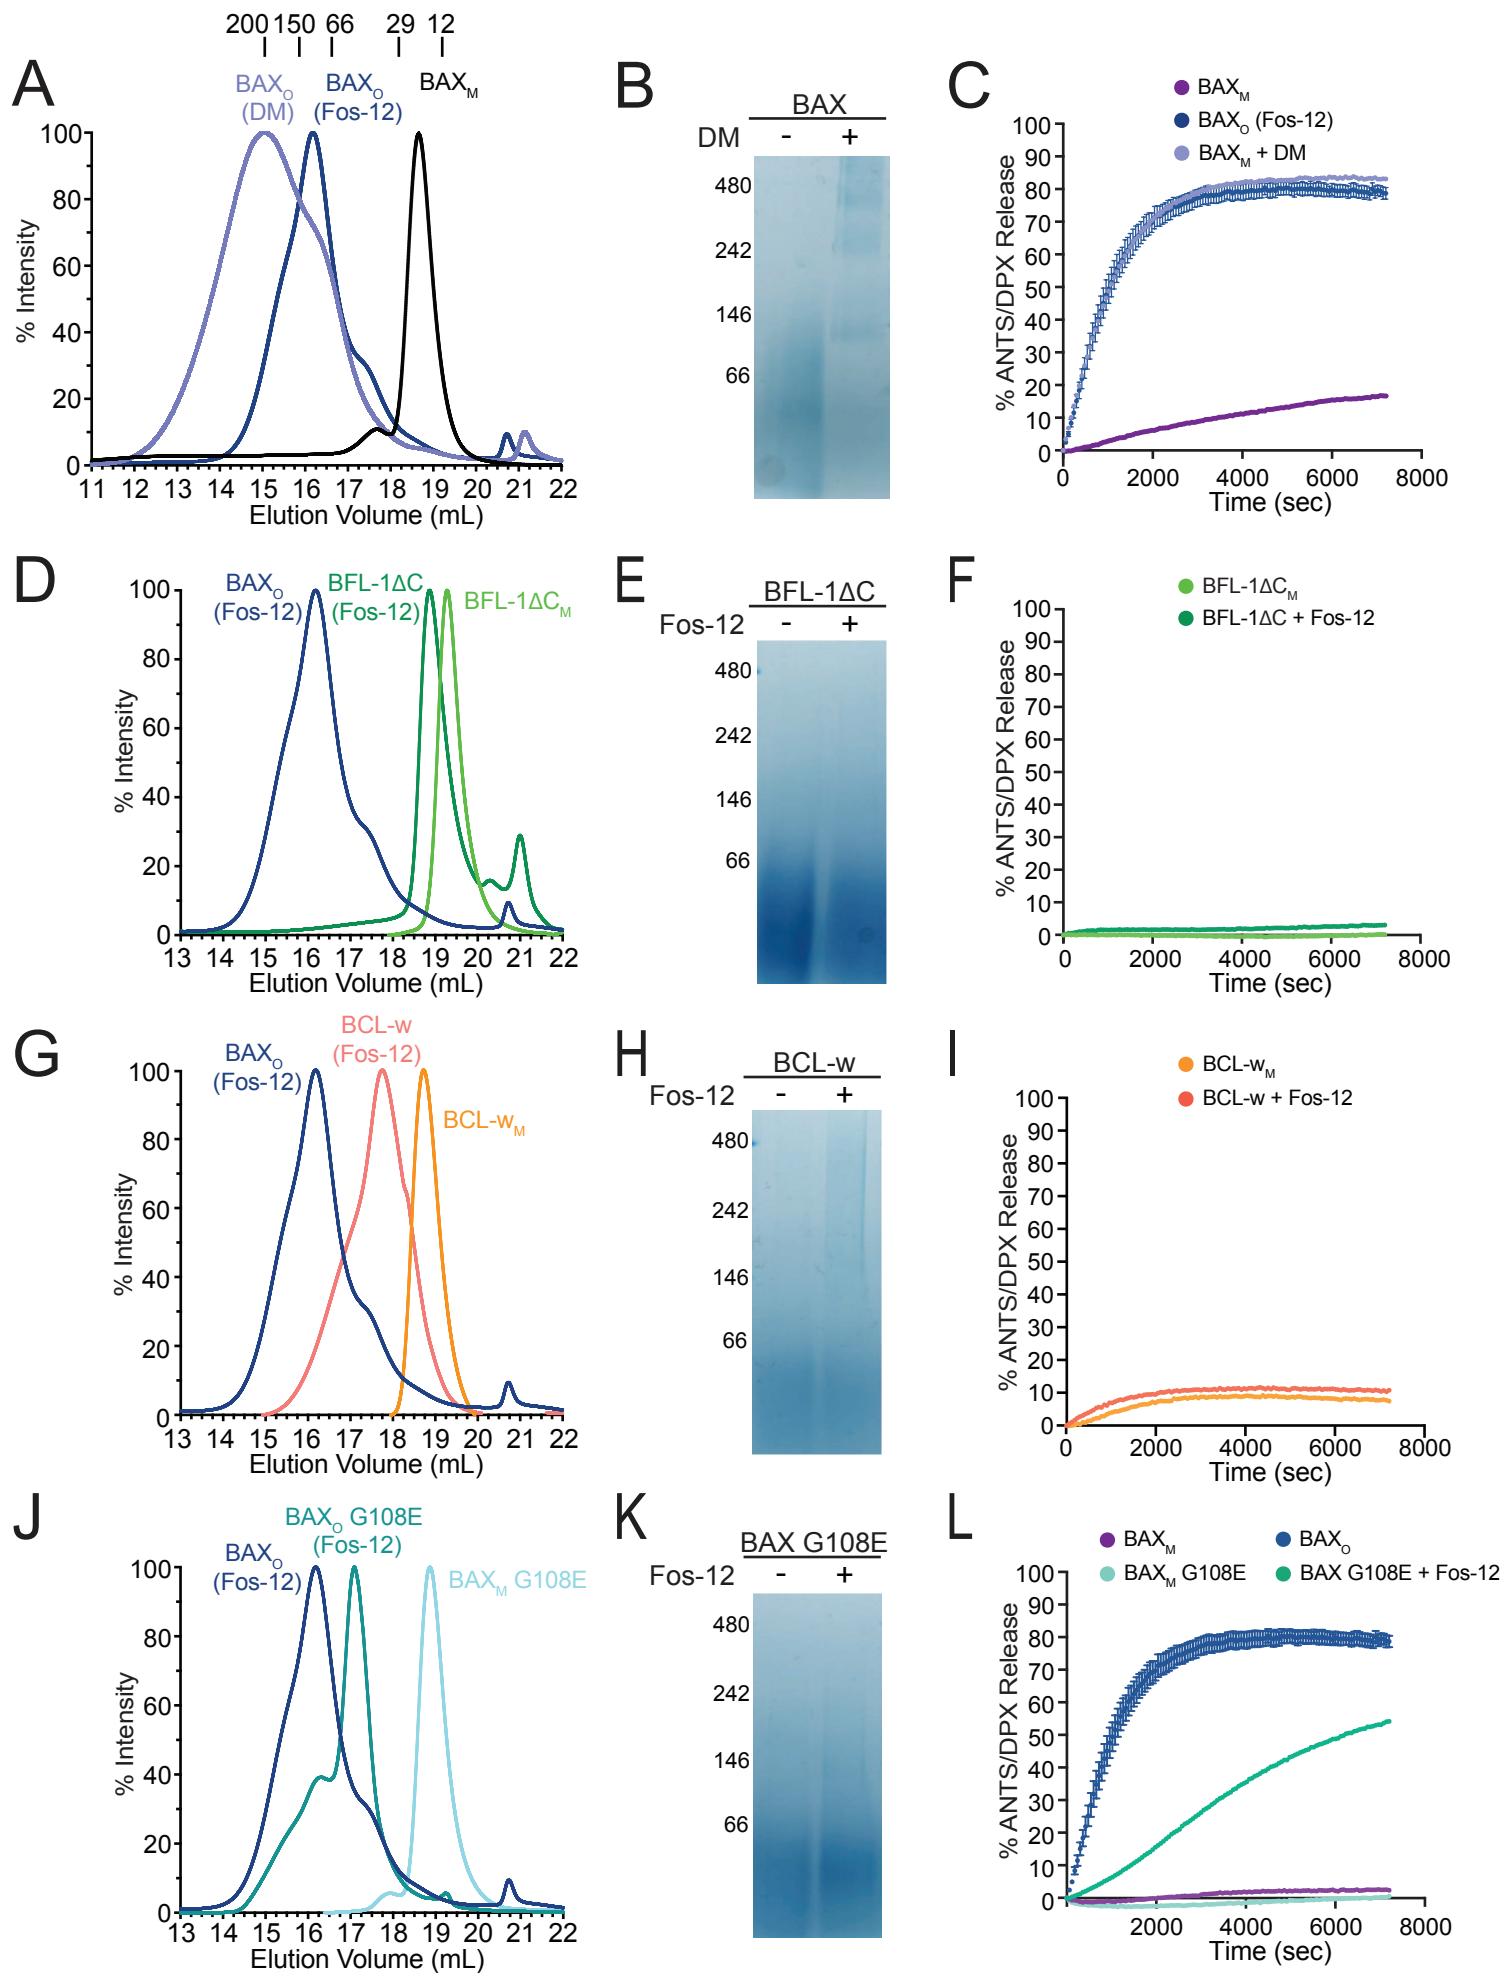

Figure S4

**Figure S4, Related to Figure 2. A series of control experiments further validate the fidelity of Fos-12-induced BAX<sub>o</sub>.**

(A) Comparative SEC analysis of BAX species generated upon treatment of full-length BAX monomer (BAX<sub>M</sub>) with DM or Fos-12. The data shown are representative of two independent biological replicates.

(B) Blue native PAGE of BAX<sub>M</sub> and DM-induced BAX oligomers, demonstrating the heterogeneity of the resultant species. The data shown are representative of two independent biological replicates.

(C) Fos-12-induced BAX<sub>o</sub> and DM-induced BAX oligomers demonstrate comparable membrane poration activity, as assessed by liposomal release assay. Error bars are mean  $\pm$  SEM for liposomal release experiments performed in technical triplicate, with data representative of two independent experiments. BAX oligomeric protein, 500 nM.

(D) Comparative SEC analysis of BFL-1 $\Delta$ C, Fos-12-treated BFL-1 $\Delta$ C, and Fos-12-induced BAX<sub>o</sub>.

(E) Blue native PAGE of BFL-1 $\Delta$ C and Fos-12-treated BFL-1 $\Delta$ C. The data shown are representative of two independent biological replicates.

(F) Fos-12-treated BFL-1 $\Delta$ C showed no membrane poration activity, as assessed by liposomal release assay. Error bars are mean  $\pm$  SEM for liposomal release experiments performed in technical triplicate, with data representative of two independent experiments. BFL-1 $\Delta$ C protein, 500 nM.

(G) Comparative SEC analysis of full-length BCL-w, Fos-12-treated BCL-w, and Fos-12-induced BAX<sub>o</sub>. The data shown are representative of two independent biological replicates.

(H) Blue native PAGE of BCL-w and Fos-12-treated BCL-w. The data shown are representative of two independent biological replicates.

(I) Fos-12-treated BCL-w showed no membrane poration activity, as assessed by liposomal release assay. Error bars are mean  $\pm$  SEM for liposomal release experiments performed in technical triplicate, with data representative of two independent experiments. BCL-w protein, 500 nM.

(J) Comparative SEC analysis of BAX<sub>M</sub> G108E, Fos-12-treated BAX G108E, and Fos-12-induced BAX<sub>O</sub>. The data shown are representative of two independent biological replicates.

(K) Blue native PAGE of BAX<sub>M</sub> G108E and Fos-12-treated BAX G108E. The data shown are representative of two independent biological replicates.

(L) Fos-12-treated BAX G108E demonstrated impaired membrane poration activity as compared to Fos-12-induced BAX<sub>O</sub> in liposomal release assays. Error bars are mean  $\pm$  SEM for liposomal release experiments performed in technical triplicate, with data representative of two independent experiments. BAX proteins, 500 nM.

A

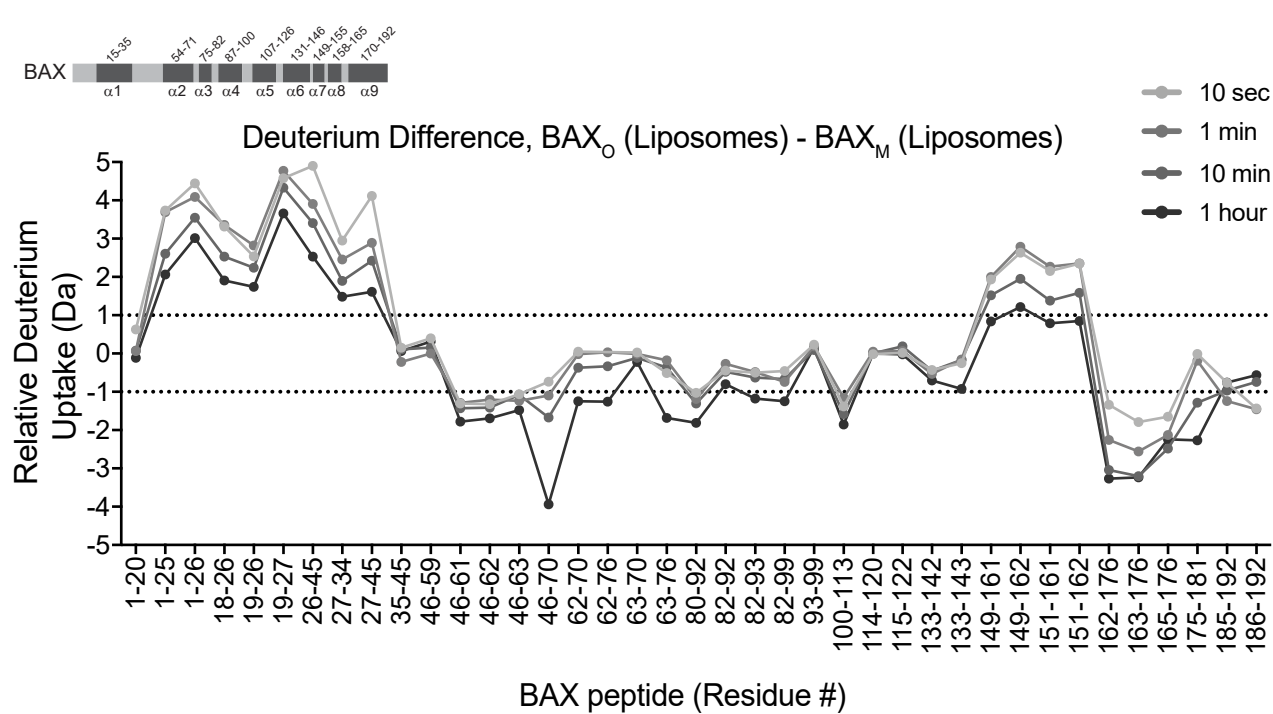

B

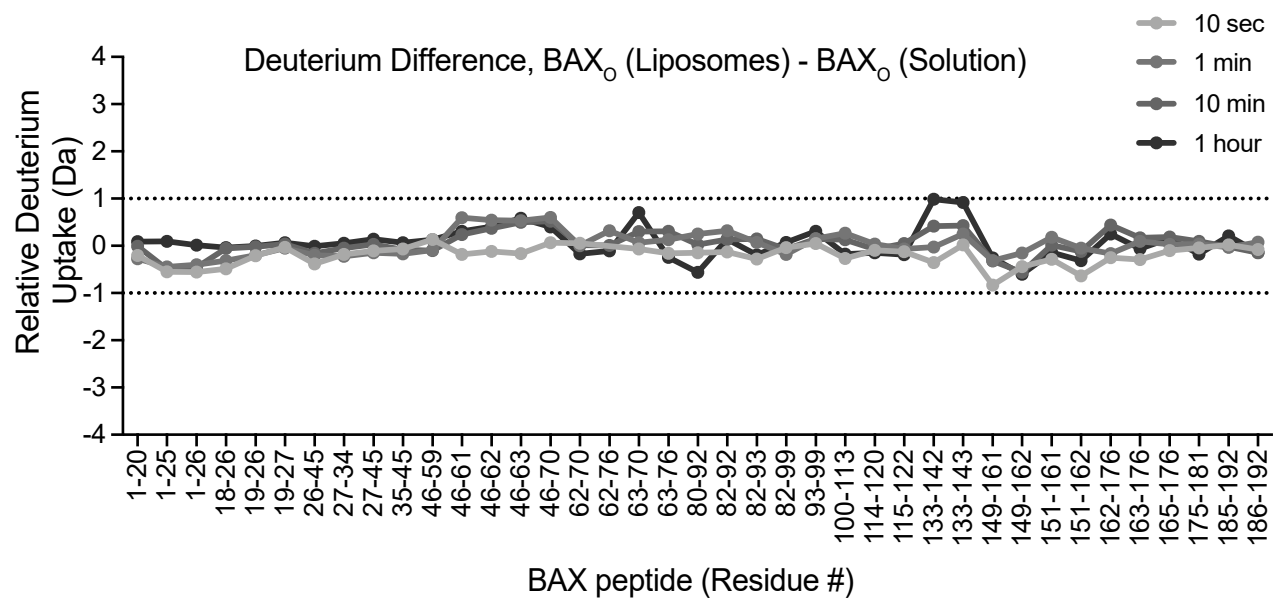

C

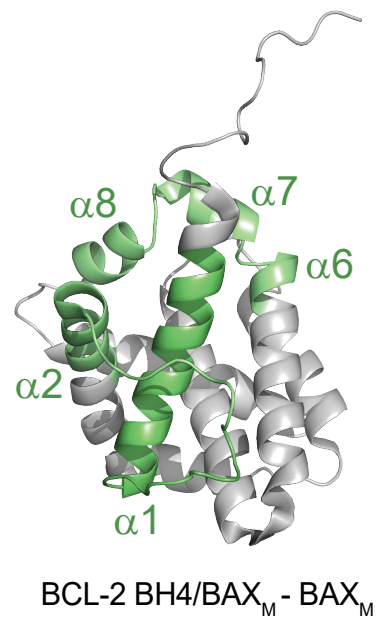

D

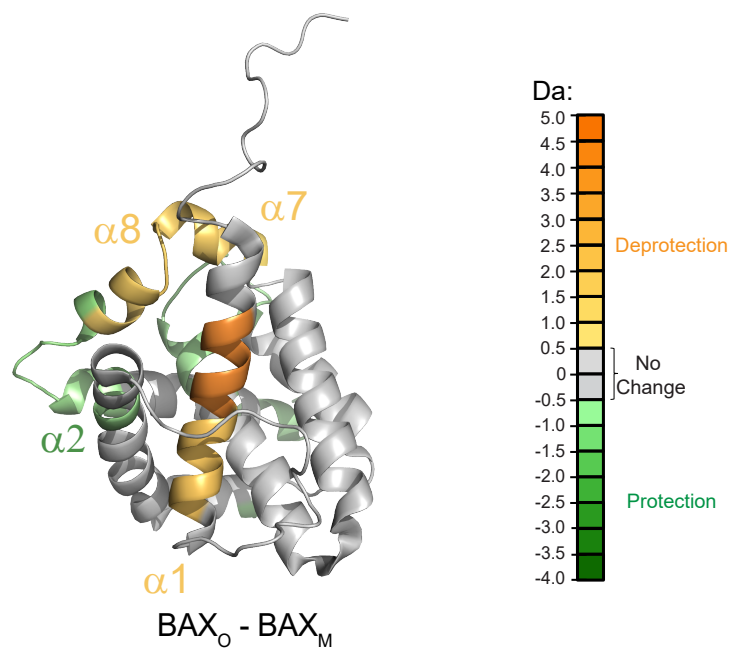

Figure S5

**Figure S5, Related to Figure 3. Comparative HXMS analyses of BAX<sub>M</sub> vs. BAX<sub>O</sub> in the membrane environment, BAX<sub>O</sub> in solution vs. the membrane environment, and the inverse HXMS profiles of BAX<sub>O</sub> and BCL-2 BH4-inhibited BAX<sub>M</sub>.**

(A) The difference in deuterium uptake plot demonstrates the relative deuterium incorporation of BAX<sub>O</sub> (Figure 3B) minus the relative deuterium incorporation of BAX<sub>M</sub> (Figure 3A), as measured at the indicated time points in the presence of liposomes. The regions of conformational deprotection upon formation of BAX<sub>O</sub> include the N-terminus,  $\alpha 1$ , and the  $\alpha 7$ - $\alpha 8$  junction, whereas regions of protection are  $\alpha 2$ ,  $\alpha 4$ - $\alpha 5$  loop, proximal  $\alpha 5$ , distal  $\alpha 8$ , and  $\alpha 9$ . Dotted lines indicate the boundaries of significant differences in deuteration ( $\pm 1.0$  Da). Data are representative of two independent experiments.

(B) The deuterium difference plot demonstrates the relative deuterium incorporation of BAX<sub>O</sub> in the presence of liposomes minus the relative deuterium incorporation of BAX<sub>O</sub> in aqueous solution. The dotted lines indicate the boundaries for significant differences in deuteration ( $\pm 1.0$  Da), and thus highlight the absence of meaningful, detectable changes in deuterium uptake for BAX<sub>O</sub> between the membrane and aqueous conditions. Data are representative of two independent experiments.

(C-D) Comparison of the HXMS profiles of BCL-2 BH4-bound BAX<sub>M</sub> (C) and Fos-12 induced BAX<sub>O</sub> (D) demonstrate that the conformational deprotection observed upon BAX oligomerization, such as in  $\alpha 1$ ,  $\alpha 7$  and  $\alpha 8$ , are precisely those regions that are restrained upon treatment of BAX<sub>M</sub> with a stapled BCL-2 BH4 helix.

See also Table S1.

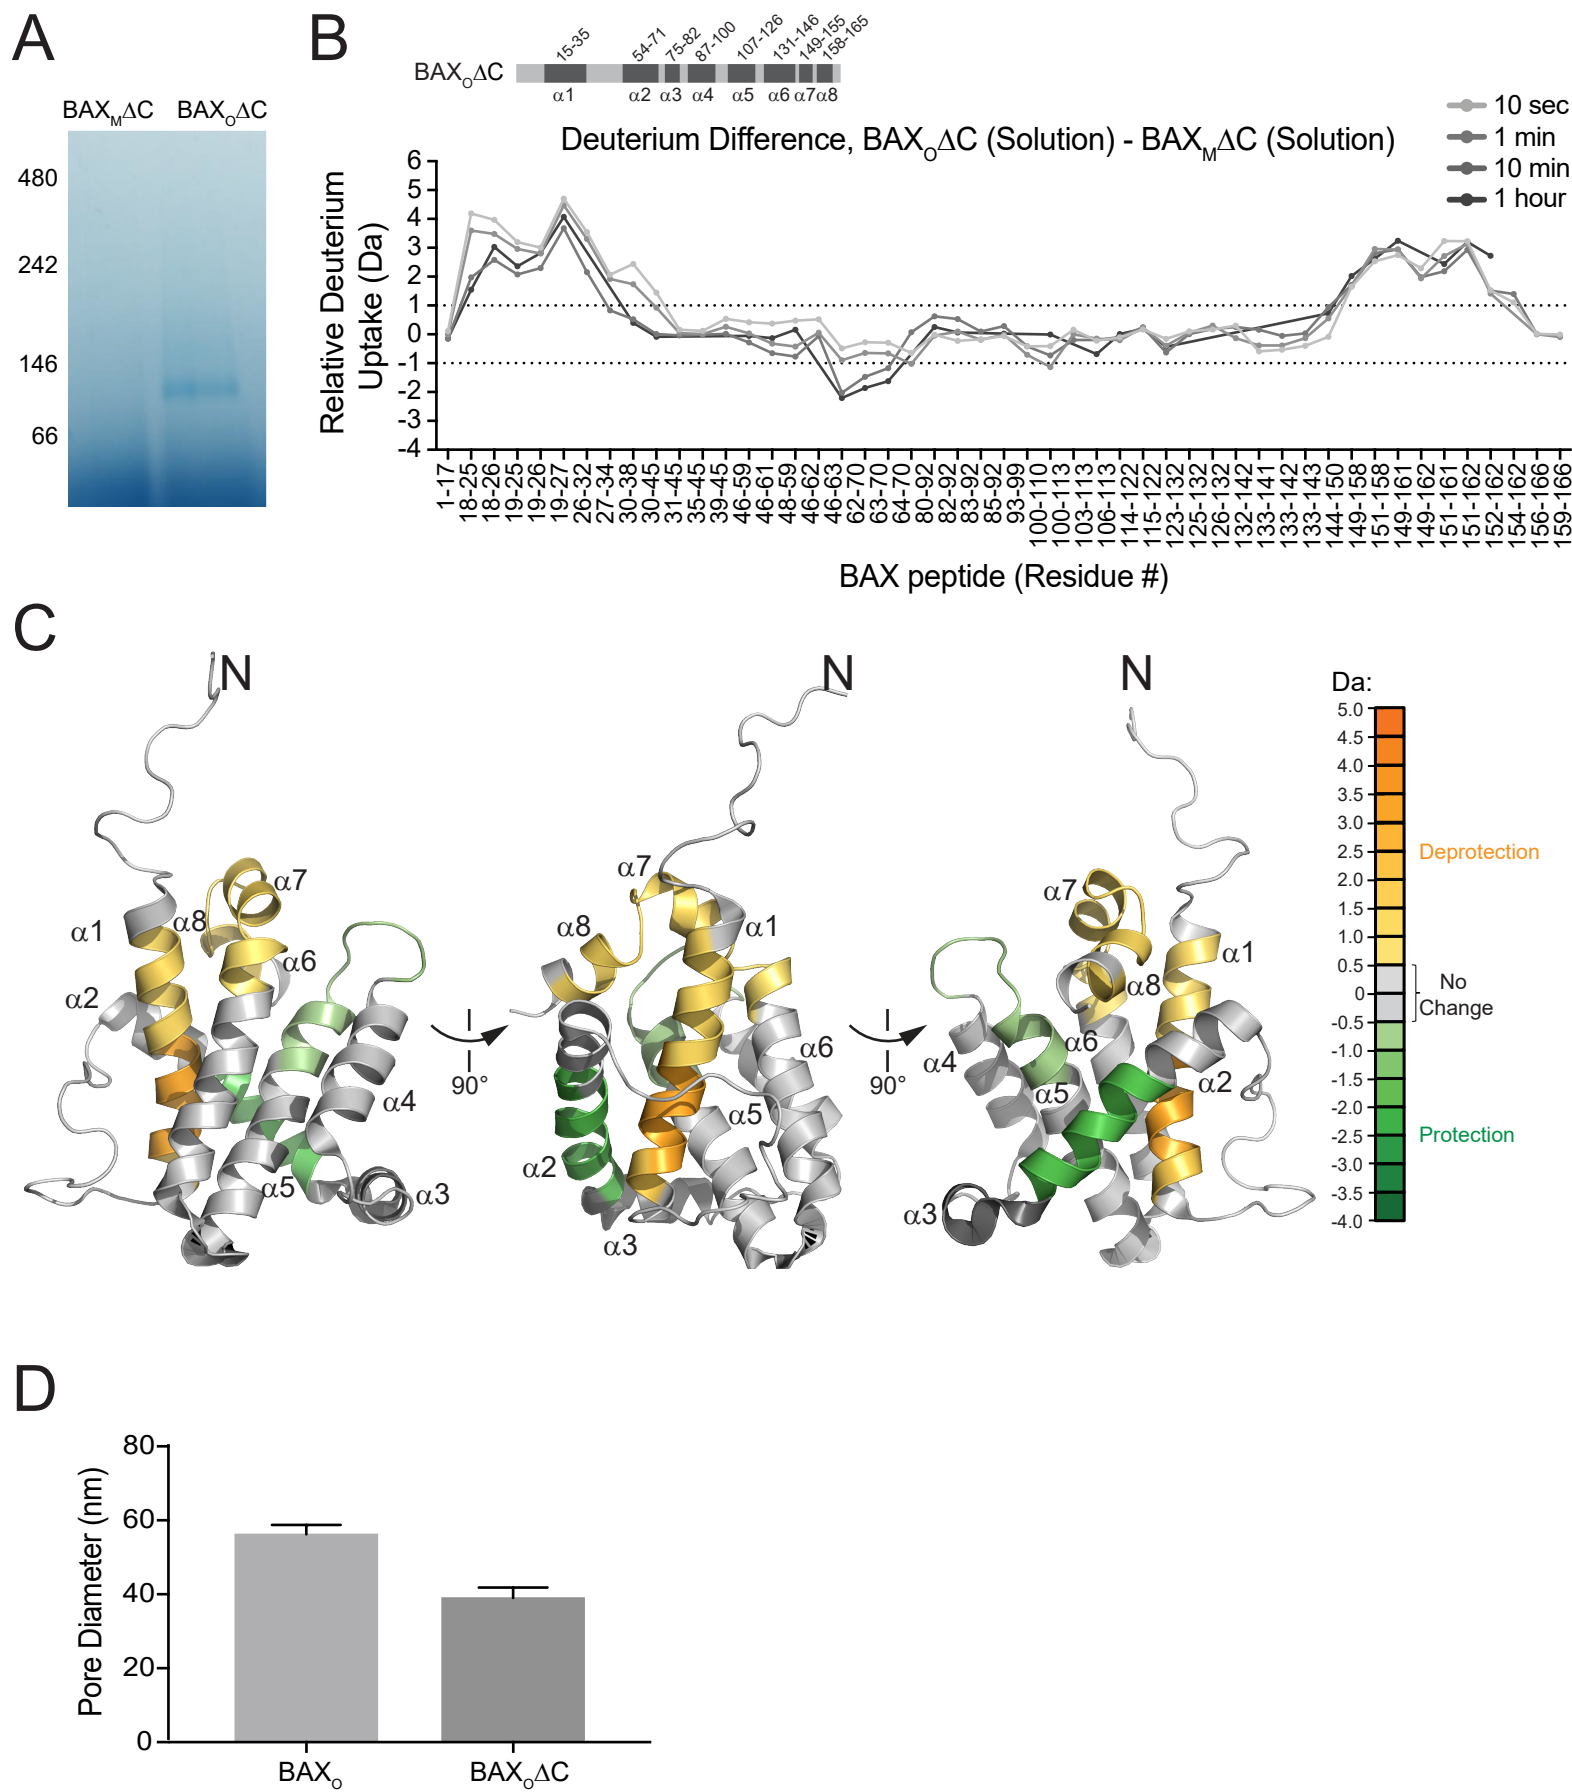

Figure S6

**Supplementary Figure S6, Related to Figure 6. Comparative HXMS analysis of BAX<sub>M</sub>ΔC and BAX<sub>O</sub>ΔC, and quantitation of liposomal poration by BAX<sub>O</sub> vs. BAX<sub>O</sub>ΔC.**

(A) Blue native PAGE of BAX<sub>M</sub>ΔC and Fos-12-induced BAX<sub>O</sub>ΔC, showing the conversion of monomeric BAXΔC into a single oligomeric band migrating at ~120 kDa. The data shown are representative of two independent biological replicates.

(B) The deuterium difference plot demonstrates the relative deuterium incorporation of BAX<sub>O</sub>ΔC minus the relative deuterium incorporation of BAX<sub>M</sub>ΔC in aqueous solution. The dotted lines indicate the boundaries for significant differences in deuteration ( $\pm 1.0$  Da). Data are representative of two independent biological replicates.

(C) The prominent regions of conformational deprotection and protection upon conversion of BAX<sub>M</sub>ΔC to BAX<sub>O</sub>ΔC are mapped onto the monomeric structure of BAX (PDB: 1F16) according to the orange and green color scale, and reflect a similar HXMS profile to that observed for the conversion of BAX<sub>M</sub> to BAX<sub>O</sub> (Figures 3, S5A).

(D) Mean pore size observed in LUVs treated with BAX<sub>O</sub> or BAX<sub>O</sub>ΔC for 15 min. Error bars are mean  $\pm$  SEM for BAX<sub>O</sub> (n=81) and BAX<sub>O</sub>ΔC (n=53) pores counted. At 15 min, 84% and 30% of the liposomes were porated/disrupted upon treatment with BAX<sub>O</sub> or BAX<sub>O</sub>ΔC, respectively.

See also Table S2.

A

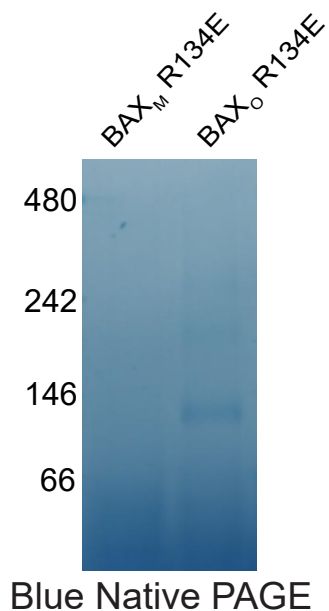

B

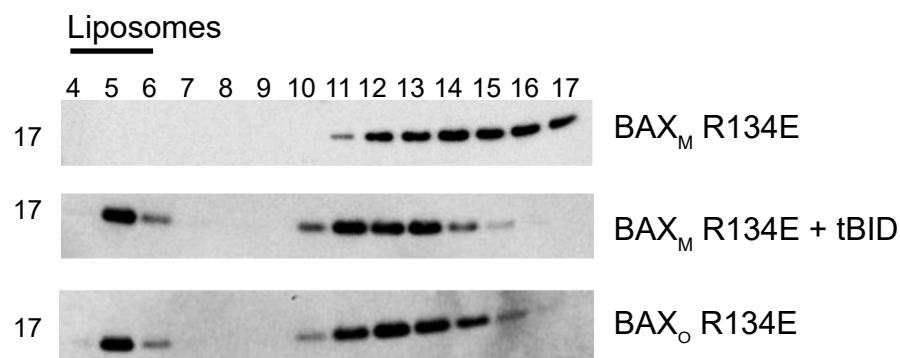

C

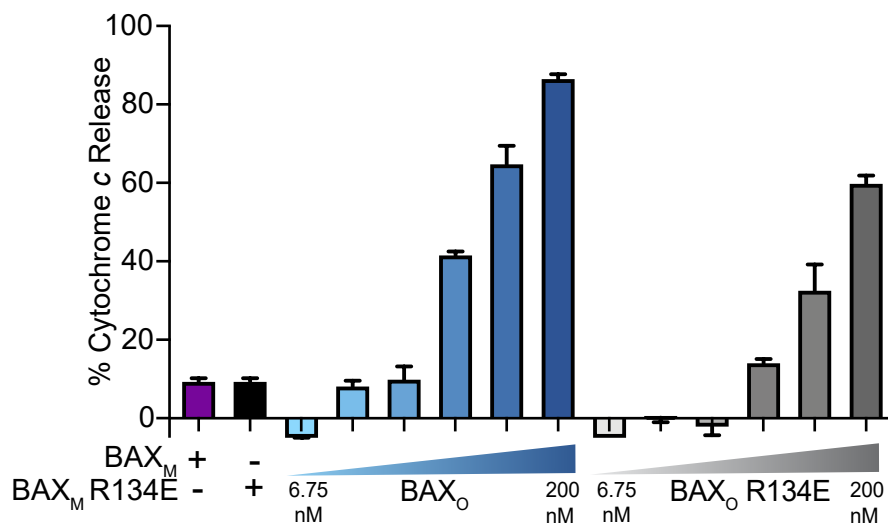

D

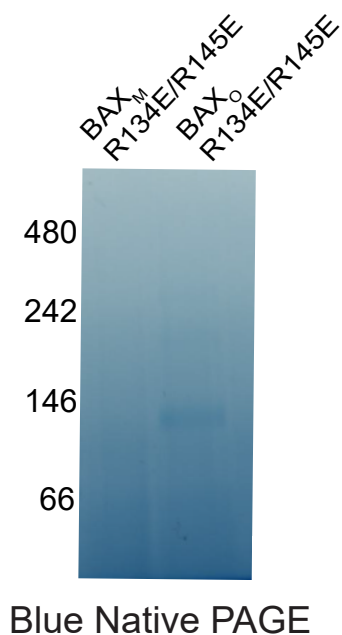

E

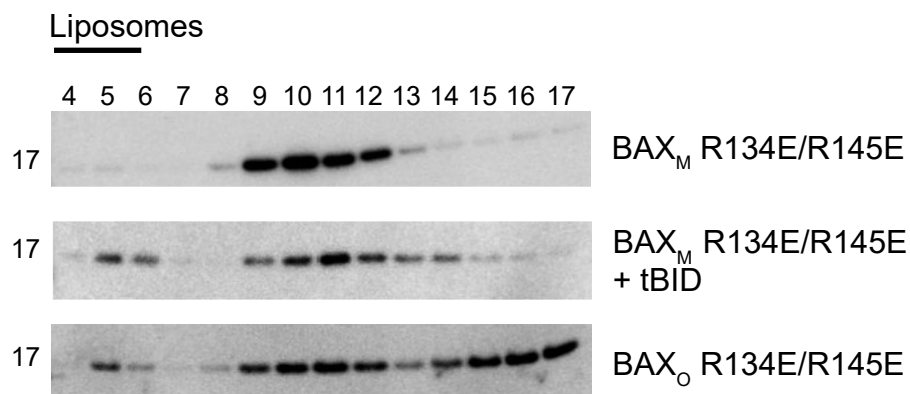

F

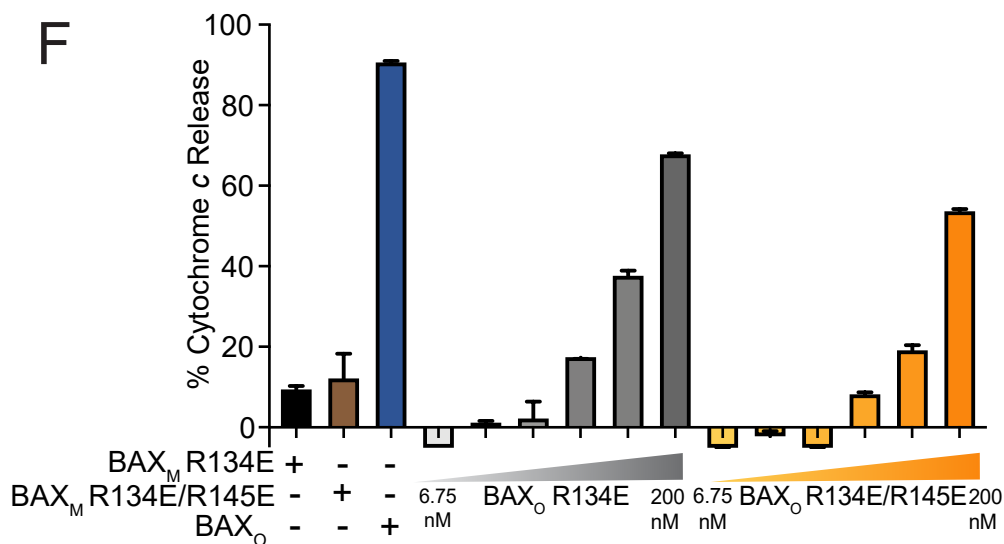

Figure S7

**Supplementary Figure S7, Related to Figure 7. Mutagenesis of conserved arginines in the amphipathic BAX  $\alpha$ 6 helix impairs mitochondrial membrane permeabilization by BAX<sub>o</sub>.**

(A) Blue native PAGE of BAX<sub>M</sub> R134E and Fos-12-induced BAX<sub>o</sub> R134E, demonstrating the conversion of monomeric BAX R134E into a single oligomeric band migrating at ~146 kDa.

(B) Comparative membrane translocation of tBID-triggered BAX R134E and BAX<sub>o</sub> R134E, as monitored by liposomal translocation assay and BAX western analysis. Liposomal fractions are marked with an overlying black bar (4-6), with supernatant fractions (7-17) to the right. The data shown are representative of two independent biological replicates.

(C) Comparative dose-responsive cytochrome *c* release upon treatment of BAX/BAK-deficient mouse liver mitochondria with BAX<sub>o</sub> or BAX<sub>o</sub> R134E. Error bars are mean  $\pm$  SEM for cytochrome *c* release experiments performed in technical triplicate, with data representative of two independent experiments. BAX<sub>M</sub> and BAX<sub>M</sub> R134E, 200 nM; BAX<sub>o</sub> and BAX<sub>o</sub> R134E, 6.25-200 nM.

(D) Blue native PAGE analysis of BAX<sub>M</sub> R134E/R145E and Fos-12-induced BAX<sub>o</sub> R134E/R145E, demonstrating the conversion of monomeric BAX R134E/R145E into a single oligomeric band migrating at ~146 kDa.

(E) Comparative membrane translocation of tBID-triggered BAX<sub>M</sub> R134E/R145E and BAX<sub>o</sub> R134E/R145E, as monitored by liposomal translocation assay and BAX western analysis. Liposomal fractions are marked with an overlying black bar (4-6), with

supernatant fractions (7-17) to the right. The data shown are representative of two independent biological replicates.

(F) Comparative dose-responsive cytochrome *c* release upon treatment of BAX/BAK-deficient mouse liver mitochondria with BAX<sub>O</sub> R134E or BAX<sub>O</sub> R134E/R145E. Error bars are mean  $\pm$  SEM for cytochrome *c* release experiments performed in technical triplicate, with data representative of two independent experiments. BAX<sub>M</sub> R134E and BAX<sub>M</sub> R134E/R145E, 200 nM; BAX<sub>O</sub> R134E and BAX<sub>O</sub> R134E/R145E, 6.25-200 nM.

| <b>Data Set</b>                                                      | <b>BAX<sub>M</sub></b>                                                         | <b>BAX<sub>M</sub> + liposomes</b> | <b>BAX<sub>O</sub></b> | <b>BAX<sub>O</sub> + liposomes</b> |
|----------------------------------------------------------------------|--------------------------------------------------------------------------------|------------------------------------|------------------------|------------------------------------|
| <b>HDX reaction details <sup>a</sup></b>                             | Final D <sub>2</sub> O concentration = 92.3%, pH <sub>read</sub> = 6.60, 21 °C |                                    |                        |                                    |
| <b>HDX time course</b>                                               | 0.167, 1, 10, and 60 minutes                                                   |                                    |                        |                                    |
| <b>HDX controls</b>                                                  | 6 undeuterated controls, at least one for each state                           |                                    |                        |                                    |
| <b>Back-exchange</b>                                                 | 30-35%                                                                         |                                    |                        |                                    |
| <b>Number of peptides <sup>b</sup></b>                               | 80 identified, 39 followed coincident in all 4 states                          |                                    |                        |                                    |
| <b>Sequence coverage<sup>c</sup></b>                                 | 89.1%                                                                          |                                    |                        |                                    |
| <b>Average peptide length<sup>c</sup><br/>Redundancy<sup>c</sup></b> | Average length: 13.21<br>Redundancy: 3.01                                      |                                    |                        |                                    |
| <b>Replicates</b>                                                    | 2 biological replicates, 2 technical replicates of each biological             |                                    |                        |                                    |
| <b>Repeatability</b>                                                 | +/- 0.25 relative Da                                                           |                                    |                        |                                    |
| <b>Meaningful differences</b>                                        | ≥ 1.0 Da                                                                       |                                    |                        |                                    |

<sup>a</sup> 12-fold dilution with labeling buffer [10 mM HEPES, 200 mM KCl, 1 mM MgCl<sub>2</sub>, pD 7.0]. 1-fold dilution with quench buffer [0.8 M GdmCl, 0.8% FA pH 2.5].

<sup>b</sup> Parameters to filter peptides for identification from the 6 undeuterated controls were: 4 consecutive products, 0.4 fragmentation products per amino acid, 10 ppm error.

<sup>c</sup> Calculated for those peptides that were coincident in all 4 states for comparative analyses.

**Table S1, Related to Figure 3. Data summary and list of experimental parameters for HXMS analyses of BAX<sub>M</sub> and BAX<sub>O</sub>.**

| <b>Data Set</b>                                                      | <b>BAX<sub>M</sub>ΔC</b>                                                       | <b>BAX<sub>O</sub>ΔC</b> |
|----------------------------------------------------------------------|--------------------------------------------------------------------------------|--------------------------|
| <b>HDX reaction details <sup>a</sup></b>                             | Final D <sub>2</sub> O concentration = 94.7%, pH <sub>read</sub> = 6.60, 21 °C |                          |
| <b>HDX time course</b>                                               | 0.167, 1, 10, and 60 minutes                                                   |                          |
| <b>HDX controls</b>                                                  | 4 undeuterated controls, 2 for each state                                      |                          |
| <b>Back-exchange</b>                                                 | 30-35%                                                                         |                          |
| <b>Number of peptides <sup>b</sup></b>                               | 85 identified, 50 followed coincident in both states                           |                          |
| <b>Sequence coverage<sup>c</sup></b>                                 | 94.6%                                                                          |                          |
| <b>Average peptide length<sup>c</sup><br/>Redundancy<sup>c</sup></b> | Average length: 10.44<br>Redundancy: 3.32                                      |                          |
| <b>Replicates</b>                                                    | 2 biological replicates, 1 technical replicate of each biological              |                          |
| <b>Repeatability</b>                                                 | +/- 0.25 relative Da                                                           |                          |
| <b>Meaningful differences</b>                                        | ≥ 1.0 Da                                                                       |                          |

<sup>a</sup> 18-fold dilution with labeling buffer [10 mM HEPES, 200 mM KCl, 1 mM MgCl<sub>2</sub>, pD 7.0]. 1-fold dilution with quench buffer [0.8 M GdmCl, 0.8% FA pH 2.5].

<sup>b</sup> Parameters to filter peptides for identification from the 4 undeuterated controls were: 1 consecutive products, 0.25 fragmentation products per amino acid, 10 ppm error.

<sup>c</sup> Calculated for those peptides that were coincident in both states for comparative analyses.

Table S2

**Table S2, Related to Figures 6 and S6. Data summary and list of experimental parameters for HXMS analyses of BAX<sub>M</sub>ΔC and BAX<sub>O</sub>ΔC.**
